# Supplementary material
Source: PubMed Central journal article supplement (PMC8190797)
Supplement: NIHMS1609058-supplement-Supplemental_Materials__including_Supplemental_Tables_S1_-_S3.pdf [file NIHMS1609058-supplement-Supplemental_Materials__including_Supplemental_Tables_S1_-_S3.pdf]

## **SUPPLEMENTAL METHODS**

### **Expression data pre-processing**

For each therapeutic trial, baseline and post-treatment samples for improvers and non-improvers were pre-processed separately. Non-centered gene expression data were imputed for missing values and collapsed to unique genes via corresponding GenePattern (Reich et al., 2006) modules with default settings and median-centered via Cluster 3.0 (de Hoon et al., 2004).

### **Functional enrichment analyses and differential pathway expression**

All functional enrichment analyses throughout the work were performed using the gprofiler function in the gProfileR R package (Reimand et al., 2011) with default parameters. Differentially expressed pathways were identified using Gene Set Enrichment Analysis (GSEA) (Subramanian et al., 2005) and the Hallmark database (Liberzon et al., 2015). Hallmarks with False Discovery Rate  $\leq 5\%$  were treated as significant. GSEA runs were done via the GenePattern module with default settings except for permutation type, which was changed to 'gene set' due to the small sample sizes.

Hallmarks hit by multiple drugs were investigated in more detail. For each drug, core enrichment genes (genes that contribute most to the enrichment) for a given significant Hallmark were compared to core enrichment genes from this Hallmark hit by other drugs. This way, for each Hallmark we generated core enrichment gene signatures hit by multiple drugs.

## **Functional association between drug signatures**

For performing functional associations between drug signatures, the top-ranking 250 genes from each signature were considered the “gene set” for that drug. Those gene symbols were converted to Entrez IDs using gconvert as implemented in the gProfileR R package (Reimand et al., 2011). Functional association scores (z-scores) were calculated as described in Huttenhower, et al. (Huttenhower et al., 2009) and Greene, et al. (Greene et al., 2015). Briefly, for drug pair  $i$  and  $j$ , the t-statistic between the two gene sets is calculated as follows:

$$t_{i,j} = \frac{X_w - X_b}{S_x}, \quad S_x = \sqrt{\frac{S_w^2}{n_w} + \frac{S_b^2}{n_b}}$$

where  $X_w$  is the mean weight of all edges between the drug gene sets,  $X_b$  is the mean weight of all edges incident to either gene set in the GIANT skin network, and  $s$  and  $n$  are the standard deviation and size of the distributions. The z-score (functional association statistic) was calculated by generating a null distribution (1,000 random gene set pairs of the same sizes as drug gene sets  $i$  and  $j$ ), where  $t_{i,j}$  is the t-statistic between the drug pair (as calculated above) and  $\mu$  and  $s$  are the mean and standard deviation of the null distribution, respectively.

$$z_{i,j} = \frac{t_{i,j} - \mu}{s}$$

**Figure S2A, S2B and S2C** were generated by calculating the functional association between different drugs’ improver signatures, non-improver signatures, and the same drugs’ improver and non-improver signatures (“within drug”), respectively.

## **Functional module analyses**

Functional modules were detected using the top edges version of the GIANT skin network downloaded from the GIANT webservice ([giant.princeton.edu](http://giant.princeton.edu)). Fast-greedy modularity maximization (as implemented in the igraph R package (v0.7) (Csardi and Nepusz, 2006)) was applied iteratively until all communities were 150 genes or smaller. This was motivated by the fact that the average size of hallmark gene sets is ~150 genes and the average size of canonical pathways is ~50 genes. A histogram size of the functional modules detected is supplied as **Figure S4**.

For the improver lists, the SVM scores of genes in functional modules were compared to the overall SVM score distribution by two-sided Wilcoxon test. The raw p-values were Bonferroni adjusted; only functional modules with Bonferroni adj.  $p < 0.001$  were further considered. We calculated the intersection between drugs' top or bottom 20 significant functional modules (as ranked by median SVM score [improver lists]) to generate **Table 2**. For the comparison of functional modules between the abatacept and MMF improver lists, SVM scores were standardized (we calculated z-scores).

### **Fresolimumab base and MMF post list comparisons**

The extrapolated version of rank biased overlap (RBO) was calculated using the gesper package (Schmich et al., 2015). The extrapolated RBO formula (Webber et al., 2010) is:

$$RBO_{EXT}(L, S, l, s) = \frac{1-p}{p} \left( \sum_{d=1}^l \frac{X_d}{d} p^d + \sum_{d=s+1}^l \frac{X_s(d-s)}{sd} p^d \right) + \left( \frac{X_l - X_s}{l} + \frac{X_s}{s} \right) p^l$$

where  $p$  is a weighting parameter (we selected  $p = 1$  to place an emphasis on the top of the list),  $L$  and  $S$  are lists of depths  $l$  and  $s$  respectively, and  $d$  is the depth.  $X$  refers to the overlap (size of

the intersection) of lists S and T at the specified depth. The null distribution displayed in **Figure 4A** was generated by permuting the gene symbol labels of the MMF post ranked list. The KS-like test described as part of Connectivity Map (Lamb et al., 2006) was implemented in R. The permuted p-value was calculated by generating a null distribution of the KS statistic for gene sets of the same size (250 genes).

## REFERENCES

- Csardi G, Nepusz T (2006). The igraph software package for complex network research. *InterJournal., Complex Systems* **1695**: 1-9.
- Greene CS, Krishnan A, Wong AK, Ricciotti E, Zelaya RA, Himmelstein DS, et al (2015). Understanding multicellular function and disease with human tissue-specific networks. *Nat Genet.*
- de Hoon MJ, Imoto S, Nolan J, Miyano S (2004). Open source clustering software. *Bioinformatics* **20**: 1453-1454.
- Huttenhower C, Haley EM, Hibbs MA, Dumeaux V, Barrett DR, Collier HA, Troyanskaya OG (2009). Exploring the human genome with functional maps. *Genome Res* **19**: 1093-1106.
- Lamb J, Crawford ED, Peck D, Modell JW, Blat IC, Wrobel MJ, et al (2006). The Connectivity Map: using gene-expression signatures to connect small molecules, genes, and disease. *Science* **313**: 1929-1935.
- Liberzon A, Birger C, Thorvaldsdóttir H, Ghandi M, Mesirov JP, Tamayo P (2015). The Molecular Signatures Database (MSigDB) hallmark gene set collection. *Cell Syst* **1**: 417-425.
- Reich M, Liefeld T, Gould J, Lerner J, Tamayo P, Mesirov JP (2006). GenePattern 2.0. *Nat Genet* **38**: 500-501.
- Reimand J, Arak T, Vilo J (2011). g: Profiler web server for functional interpretation of gene lists (2011 update). *Nucleic Acids Res*: gkr378.
- Schmich F, Szczurek E, Kreibich S, Dilling S, Andritschke D, Casanova A, et al (2015). gesper: a statistical model for deconvoluting off-target-confounded RNA interference screens. *Genome Biol* **16**: 220.

Subramanian A, Tamayo P, Mootha VK, Mukherjee S, Ebert BL, Gillette MA, et al (2005).

Gene set enrichment analysis: a knowledge-based approach for interpreting genome-wide expression profiles. *Proc Natl Acad Sci U S A* **102**: 15545-15550.

Webber W, Moffat A, Zobel J (2010). A similarity measure for indefinite rankings. *ACM Transactions on Information Systems (TOIS)* **28**: 20.

## SUPPLEMENTAL FIGURES

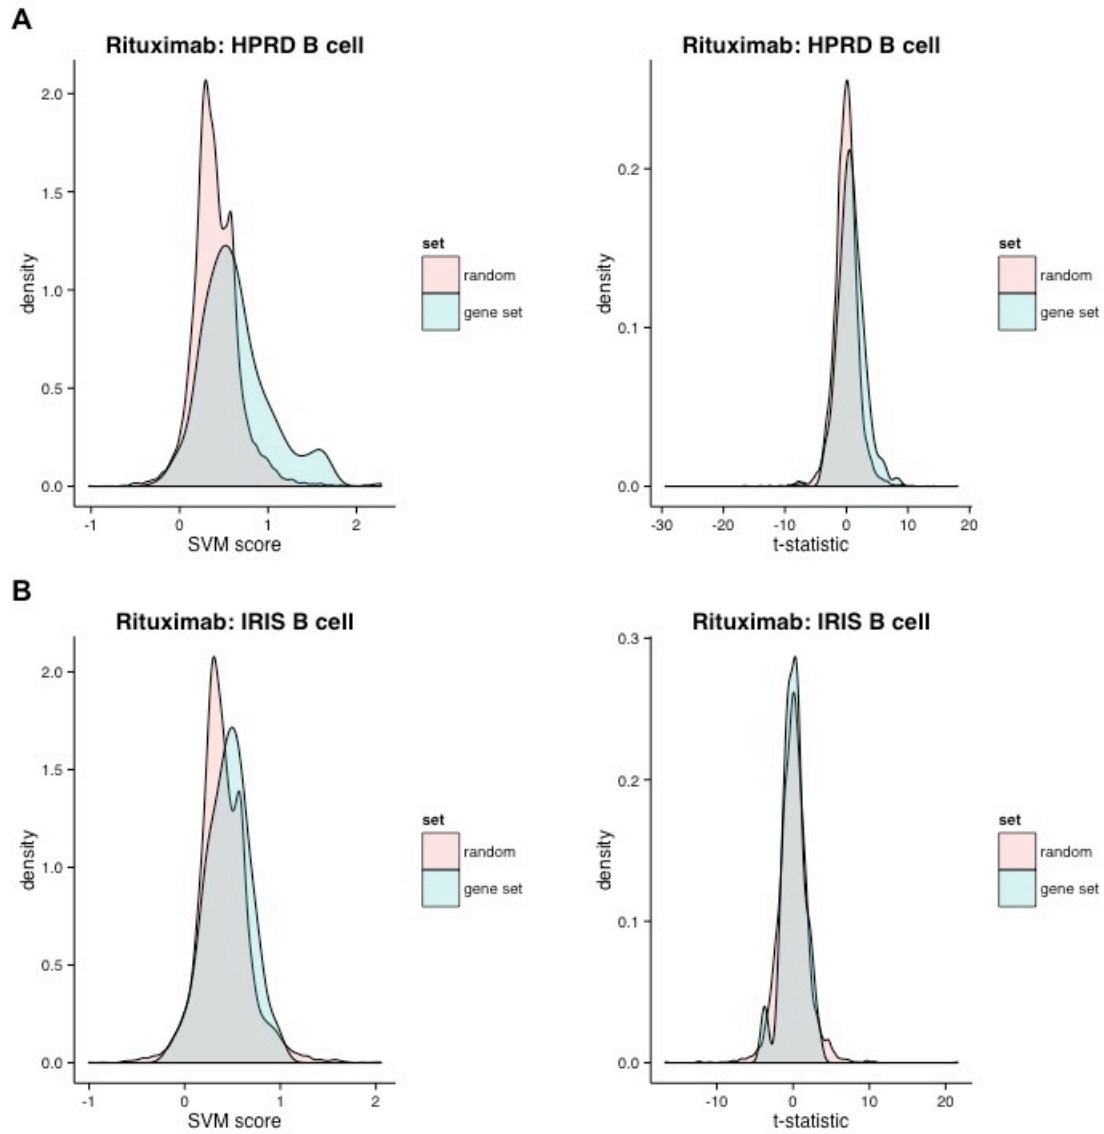

**Figure S1. B cell genes, at either the gene expression (IRIS) or protein (HPRD) level, have significantly higher rituximab SVM scores than random gene sets of the same size. IRIS SVM score Mann-Whitney-Wilcoxon  $p = 0.029$ , IRIS t-statistic Mann-Whitney-Wilcoxon  $p = 0.38$ .**

### A. Improvers

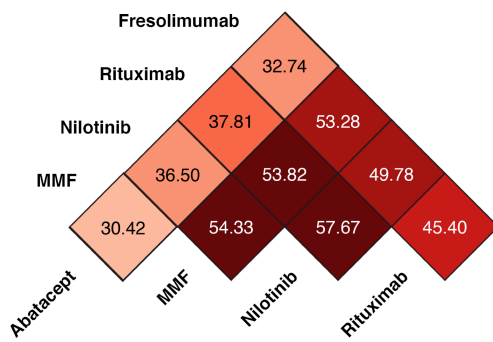

### B. Non-improvers

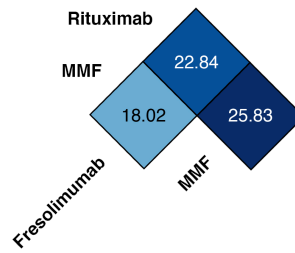

### C. Improver non-improver within drug comparison

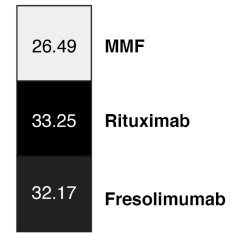

**Figure S2. Z-scores were calculated to measure functional association between different drug signatures.** Drug signatures were the 250 top-ranked genes (SVM scores) or all genes with positive scores (whichever list was smaller). High scores are indicative of significant association between signatures. (A) Improver signature associations. Genes that decrease post-treatment in improvers are highly significantly functionally related, suggesting common pathways are necessary for the resolution of skin disease regardless of drug mechanism of action. (B) Non-improver signature associations. Genes that decrease during treatment in patients with stable or slightly worse skin disease severity are functionally related, but less so than improver drug signatures. (C) Improver and non-improver signatures from the same drug — ‘within drug’ association — are significantly functionally related suggesting some common perturbation or ‘treatment-effect’ that can be detected using this approach. Network analysis techniques can be used to distinguish treatment network signature from improvement.



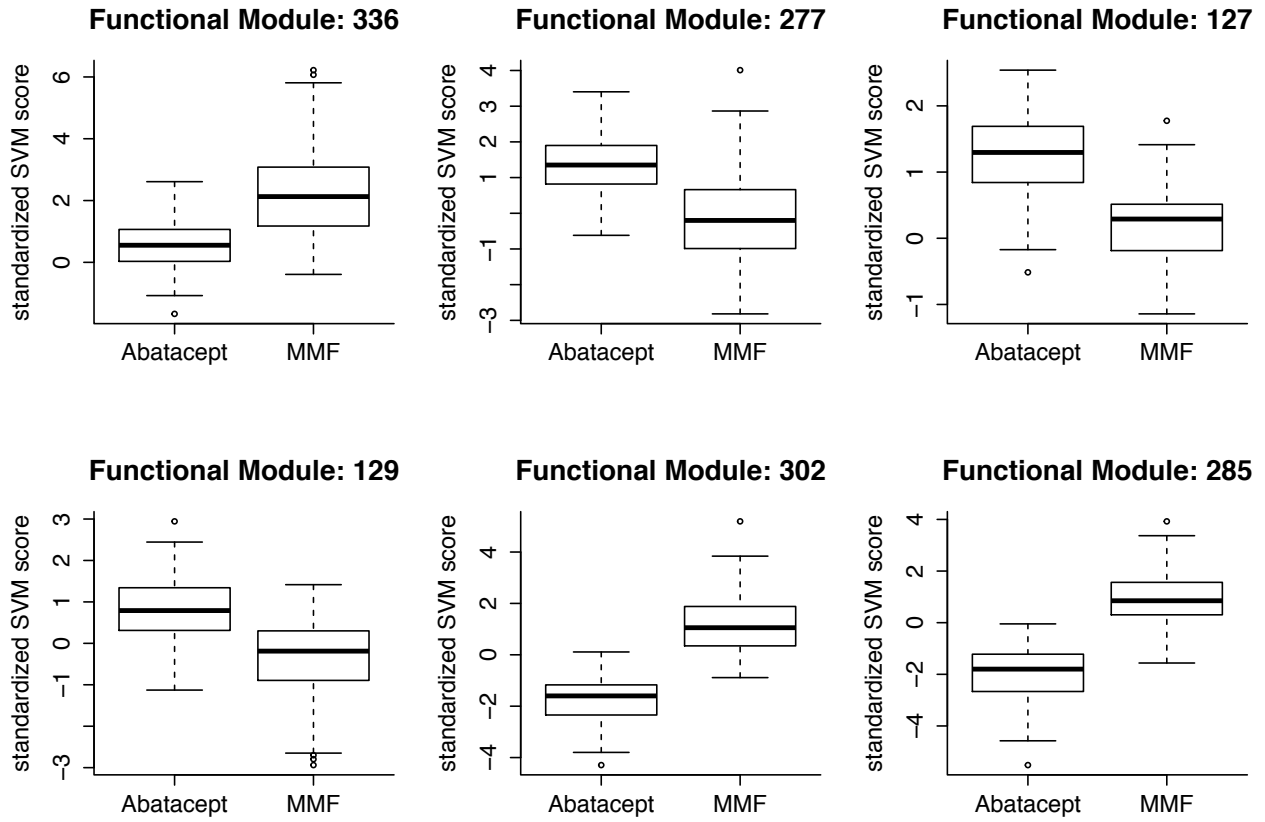

**Figure S3. Boxplots of selected functional modules with significantly different standardized SVM scores between abatacept and MMF. Wilcoxon test, Bonferroni adj.  $p < 0.0001$ .**

### Skin network functional module size

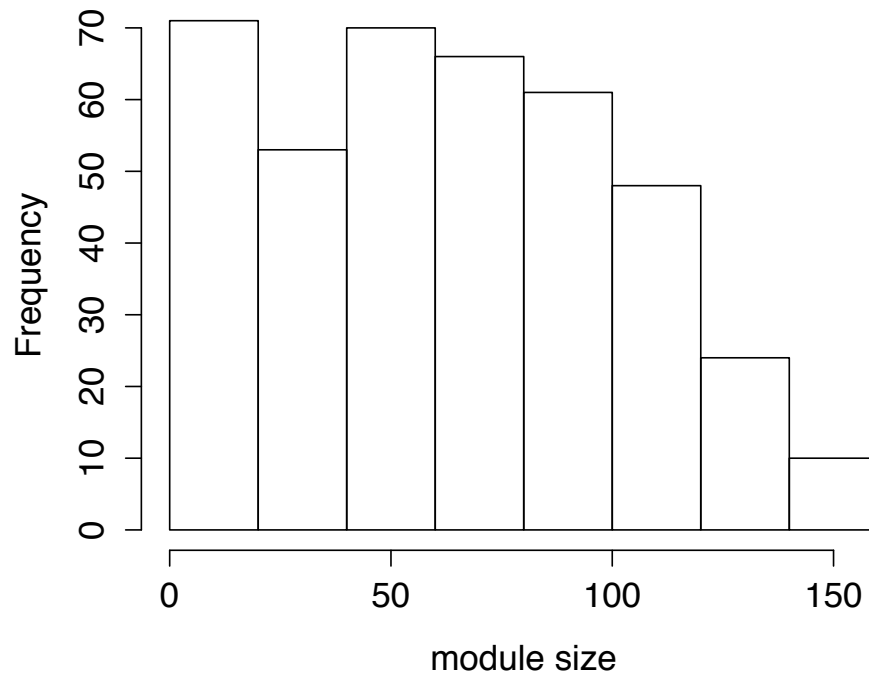

**Figure S4. Distribution of genome-wide GIANT skin network functional module size (number of genes/vertices/nodes).**

## SUPPLEMENTAL TABLES

| Treatment    | N of patients in original study | N of patients included in this study <sup>1</sup> | Study type     | GEO accession number | NCT number  |
|--------------|---------------------------------|---------------------------------------------------|----------------|----------------------|-------------|
| Abatacept    | 7 (10) <sup>2</sup>             | 6                                                 | Phase 1, 2/RCT | GSE66321             | NCT00442611 |
| Fresolimumab | 15                              | 10                                                | Phase 1        | GSE55036             | NCT01284322 |
| MMF          | 34                              | 18                                                | Open-label     | GSE76886             | NCT00853788 |
| Nilotinib    | 10                              | 6                                                 | Phase 2/pilot  | GSE65405             | NCT01166139 |
| Rituximab    | 13                              | 11                                                | Pilot          | GSE32413             | NA          |

**Table S1. Detailed information about clinical trials analyzed in this study.**

<sup>1</sup> – number of patients for which baseline and post-treatment gene expression data were available

<sup>2</sup> – abatacept study was the only one in which patients were randomized to placebo (3/10). In order to be consistent, we have excluded gene expression data available for placebo patients from this study (2/3).

GEO – Gene Expression Omnibus, NCT – National Clinical Trial, RCT – randomized controlled trial, NA – information not available.

| Functional Module          | Selected Enriched Biological Processes                                                                                                                                                                            |
|----------------------------|-------------------------------------------------------------------------------------------------------------------------------------------------------------------------------------------------------------------|
| <b>Higher in Abatacept</b> |                                                                                                                                                                                                                   |
| 127                        | REACTOME Immunoregulatory interactions between a Lymphoid and Non-Lymphoid cell, GO BP positive regulation of gamma-delta T cell activation, GO BP interleukin-12 production, GO BP defense response to bacterium |
| 129                        | GO BP vasculature development, GO BP angiogenesis, KEGG Wnt signaling, KEGG Vascular smooth muscle contraction                                                                                                    |
| 277                        | GO BP positive regulation of angiogenesis, GO BP elastic fiber assembly, GO CC complex of collagen trimers, REACTOME Collagen biosynthesis and modifying enzymes                                                  |
| <b>Higher in MMF</b>       |                                                                                                                                                                                                                   |
| 285                        | REACTOME DNA repair, KEGG Cell Cycle, GO BP cellular response to DNA damage stimulus, GO BP ATP-dependent chromatin remodeling                                                                                    |
| 302                        | REACTOME G2/M Checkpoints, REACTOME Separation of Sister Chromatids, GO BP small GTPase mediated signal transduction, GO BP CENP-A containing chromatin organization                                              |
| 336                        | REACTOME RIG-I/MDA5 mediated induction of IFN-alpha/beta pathways, REACTOME Antigen processing-Cross presentation, GO BP response to type I interferon, GO BP negative regulation of viral life cycle             |

**Table S2. Selected functional modules with significantly different standardized SVM scores between abatacept and MMF.** Wilcoxon test, Bonferroni adj.  $p < 0.0001$ . Functional enrichment was performed using gProfileR (Reimand et al., 2011). GO BP and CC stand for Gene Ontology Biological Process and Cellular Component, respectively.

| <b>Drugs</b>                                        | <b>Hallmarks</b>               | <b>Common core enrichment genes</b>                                                                                                                                                           |
|-----------------------------------------------------|--------------------------------|-----------------------------------------------------------------------------------------------------------------------------------------------------------------------------------------------|
| All                                                 | <i>EMT</i>                     | <i>IGFBP3, LOXL2, MMP3, PTX3, THBS1, TNC, VCAM1</i>                                                                                                                                           |
| Abatacept<br>MMF<br>Nilotinib<br>Rituximab          | <i>Allograft rejection</i>     | <i>BCL3, CCL2, CCR1, FAS, FYB, GZMA, GZMB, HLA-DMA, IFNGR1, LTB, SRGN, TNF, WARS</i>                                                                                                          |
|                                                     | <i>Apoptosis</i>               | <i>CASP1, FAS, GPXI, PPT1, TAP1, TNF, TNFRSF12A</i>                                                                                                                                           |
|                                                     | <i>Complement</i>              | <i>C3, CASP1, CDH13, GCA, GZMA, GZMB, LAP3, LTF, PLEK, PLSCR1, SERPINE1</i>                                                                                                                   |
|                                                     | <i>IFNA response</i>           | <i>BATF2, CASP1, CD74, IFI35, IFIH1, IFIT3, IFITM1, IRF7, IRF9, LAMP3, LAP3, LPAR6, NMI, PARP9, PLSCR1, SAMD9, SAMD9L, SP110, WARS</i>                                                        |
|                                                     | <i>IFNG response</i>           | <i>APOL6, BATF2, CASP1, CCL2, CD74, CXCL9, FAS, GZMA, HLA-DMA, HLA-G, IFIH1, IFIT3, IFITM3, IL18BP, IRF7, LAP3, LYSDM2, NFKB1, NMI, OASL, PLSCR1, SLAMF7, SP110, TAP1, VAMP5, VCAM1, WARS</i> |
|                                                     | <i>IL6/JAK/STAT3 signaling</i> | <i>A2M, CSF2RA, FAS, IFNGR1, IL1R1, LTB, SOCS3, STAT1, TNF, TNFRSF12A</i>                                                                                                                     |
|                                                     | <i>Inflammatory response</i>   | <i>CCL2, CYBB, GPR183, IL15RA, IL1R1, LAMP3, NFKB1, NMI, SERPINE1</i>                                                                                                                         |
|                                                     | <i>TNFA/NFKB signaling</i>     | <i>BCL3, BHLHE40, CCL2, CYR61, DRAM1, KLF10, NFKB1, NFKB2, NFKBIE, PANX1, PLAUI, PLEK, PTX3, RELB, SERPINE1, TAP1, TNC, TNF</i>                                                               |
| Abatacept<br>Fresolimumab<br>Nilotinib<br>Rituximab | <i>TGFB signaling</i>          | <i>SERPINE1, THBS1</i>                                                                                                                                                                        |

**Table S3. Hallmarks downregulated post-treatment in improvers.**
